# Supplementary material for: The role and effectiveness of monoculture and polyculture phytoremediation systems in fish farm wastewater
Source: Royal Society of Chemistry journal article supplement (doi:10.1039/d1ra00160d), 2021-01-01
Supplement: d1ra00160d1.pdf [file d1ra00160d1.pdf]

## **Supplementary Information**

# **Role and Effectiveness of Monoculture and Polyculture Phytoremediation System in Fish Farm Wastewater**

Yin Sim Ng, Derek Juinn Chieh Chan\*

School of Chemical Engineering, Universiti Sains Malaysia, 14300 Nibong Tebal, Penang,  
Malaysia

\*To whom correspondence should be addressed:

Chan Derek Juinn Chieh  
School of Chemical Engineering  
Universiti Sains Malaysia  
14300 Nibong Tebal, Penang,  
Malaysia  
e-mail: [chderekchan@usm.my](mailto:chderekchan@usm.my)  
Tel: 604-599-6414  
Fax: 604-594-1013

**Table S1** Quality of fish farm wastewater

| <b>Parameter</b>                                     | <b>Average value</b> | <b>Range</b>   |
|------------------------------------------------------|----------------------|----------------|
| <b>Ammonia, NH<sub>3</sub>-N (mg/L)</b>              | 22.61 ± 0.95         | 16.80 - 28.10  |
| <b>Nitrate, NO<sub>3</sub><sup>-</sup>-N (mg/L)</b>  | <0.3                 | <0.3           |
| <b>Nitrite, NO<sub>2</sub><sup>-</sup>-N (mg/L)</b>  | <0.01                | <0.01          |
| <b>Phosphate, PO<sub>4</sub><sup>3-</sup> (mg/L)</b> | 3.26 ± 0.40          | 1.98 - 5.80    |
| <b>TSS (mg/L)</b>                                    | 126 ± 10             | 75 - 175       |
| <b>Turbidity (NTU)</b>                               | 151.15 ± 17.41       | 71.90 - 269.00 |
| <b>COD (mg/L)</b>                                    | 185 ± 19             | 120 - 322      |
| <b>pH</b>                                            | 7.58 ± 0.06          | 7.32 - 7.80    |

**Table S2** Statistical analysis on the pollutant level of (a) ammonia (NH<sub>3</sub>-N), (b) nitrate (NO<sub>3</sub>-N), (c) nitrite (NO<sub>2</sub><sup>-</sup>-N), (d) phosphate (PO<sub>4</sub><sup>3-</sup>), (e) total suspended solids (TSS), (f) turbidity and (g) COD in wastewater treated by *Spirodela polyrhiza* monoculture system, *Lemna* sp. monoculture system, *Spirodela polyrhiza* + *Lemna* sp. polyculture system and control system for 14 days. Statistical significance was evaluated based on one-way analysis of variance (ANOVA) followed by Fisher LSD all-pairwise comparison test at p < 0.05. The systems that do not share a letter are significantly different in their treated pollutant levels.

(a)

| Type of Treatment System                  | Day 2 | Day 4 | Day 6 | Day 8 | Day 10 | Day 12 | Day 14 |
|-------------------------------------------|-------|-------|-------|-------|--------|--------|--------|
| Control                                   | A     | A     | A     | A     | A      | A      | A      |
| <i>Spirodela</i>                          | C     | B     | B     | A     | A      | A      | A      |
| <i>Lemna</i>                              | AB    | A     | A     | A     | A      | A      | A      |
| <i>S. polyrhiza</i> +<br><i>Lemna</i> sp. | BC    | A     | A     | A     | A      | A      | A      |

(b)

| Type of Treatment System                  | Day 2 | Day 4 | Day 6 | Day 8 | Day 10 | Day 12 | Day 14 |
|-------------------------------------------|-------|-------|-------|-------|--------|--------|--------|
| Control                                   | A     | B     | AB    | B     | A      | B      | A      |
| <i>Spirodela</i>                          | A     | AB    | B     | C     | B      | C      | B      |
| <i>Lemna</i>                              | A     | AB    | AB    | A     | AB     | A      | A      |
| <i>S. polyrhiza</i> +<br><i>Lemna</i> sp. | A     | A     | A     | A     | A      | BC     | A      |

(c)

| Type of Treatment System                  | Day 2 | Day 4 | Day 6 | Day 8 | Day 10 | Day 12 | Day 14 |
|-------------------------------------------|-------|-------|-------|-------|--------|--------|--------|
| Control                                   | A     | B     | AB    | AB    | A      | B      | A      |
| <i>Spirodela</i>                          | A     | B     | C     | B     | B      | AB     | A      |
| <i>Lemna</i>                              | A     | B     | B     | A     | AB     | A      | A      |
| <i>S. polyrhiza</i> +<br><i>Lemna</i> sp. | A     | A     | A     | AB    | AB     | B      | A      |

(d)

| Type of Treatment System                  | Day 2 | Day 4 | Day 6 | Day 8 | Day 10 | Day 12 | Day 14 |
|-------------------------------------------|-------|-------|-------|-------|--------|--------|--------|
| Control                                   | A     | A     | A     | A     | A      | A      | A      |
| <i>Spirodela</i>                          | B     | B     | A     | B     | C      | B      | B      |
| <i>Lemna</i>                              | AB    | A     | A     | AB    | AB     | B      | B      |
| <i>S. polyrhiza</i> +<br><i>Lemna</i> sp. | B     | AB    | A     | AB    | BC     | B      | B      |

(e)

| Type of Treatment System                  | Day 2 | Day 4 | Day 6 | Day 8 | Day 10 | Day 12 | Day 14 |
|-------------------------------------------|-------|-------|-------|-------|--------|--------|--------|
| Control                                   | A     | A     | A     | A     | A      | A      | A      |
| <i>Spirodela</i>                          | AB    | B     | B     | C     | B      | B      | B      |
| <i>Lemna</i>                              | B     | B     | B     | BC    | B      | B      | B      |
| <i>S. polyrhiza</i> +<br><i>Lemna</i> sp. | B     | B     | AB    | B     | B      | B      | B      |

(f)

| Type of Treatment System                  | Day 2 | Day 4 | Day 6 | Day 8 | Day 10 | Day 12 | Day 14 |
|-------------------------------------------|-------|-------|-------|-------|--------|--------|--------|
| Control                                   | A     | A     | A     | A     | A      | A      | A      |
| <i>Spirodela</i>                          | A     | A     | A     | B     | A      | A      | A      |
| <i>Lemna</i>                              | A     | A     | A     | B     | A      | A      | A      |
| <i>S. polyrhiza</i> +<br><i>Lemna</i> sp. | A     | A     | A     | B     | A      | A      | A      |

(g)

| Type of Treatment System                  | Day 2 | Day 4 | Day 6 | Day 8 | Day 10 | Day 12 | Day 14 |
|-------------------------------------------|-------|-------|-------|-------|--------|--------|--------|
| Control                                   | A     | A     | A     | A     | A      | A      | A      |
| <i>Spirodela</i>                          | A     | A     | A     | A     | A      | A      | A      |
| <i>Lemna</i>                              | A     | A     | A     | A     | A      | A      | A      |
| <i>S. polyrhiza</i> +<br><i>Lemna</i> sp. | A     | A     | A     | A     | A      | A      | A      |

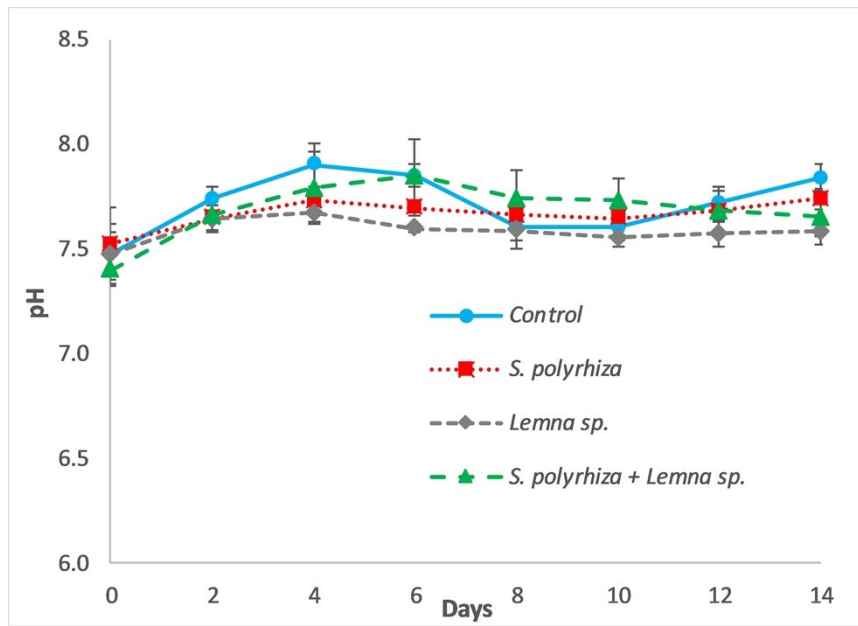

**Fig. S1** pH value of the fish farm wastewater in the *S. polyrhiza* monoculture system, *Lemna sp.* monoculture system and *S. polyrhiza + Lemna sp.* polyculture system during 14 days of experiment
